# Supplementary material for: A Carbonic Anhydrase IX/SLC1A5 Axis Regulates Glutamine Metabolism Dependent Ferroptosis in Hypoxic Tumor Cells
Source: Oxford University Press journal article supplement (doi:10.1158/1535-7163.mct-23-0041), 2023-06-22
Supplement: mct-23-0041_supplementary_table_s1_supps1.pdf [file mct-23-0041_supplementary_table_s1_supps1.pdf]

**Table S1.** Summary of shRNA constructs used to engineer gene knockdown in cells

| Target gene | Clone ID     | Mature antisense sequence |
|-------------|--------------|---------------------------|
| SLC1A5      | V2THS_56725  | TATCCATTCCTCATAATCC       |
|             | V2THS_413549 | TGTGAACACATGTACTCCA       |
|             | V2THS_393624 | AGAGTATGAGCGAAAGGCT       |
|             | V2THS_393625 | AGGTGGTAGAGTATGAGCG       |
| GLS1        | V2THS_233550 | TTAACAACTTCAACATGAC       |
|             | V2THS_95978  | TTTACCATAGGATTATGTG       |
|             | V3THS_405623 | AAAATATACATCACTACCA       |
| GCLC        | V2THS_236238 | TCAATAAATCAGGTCCCAG       |
|             | V2THS_131972 | AATTGCACCTCCATGGGTC       |
|             | V3THS_309857 | TTCTCTTCAAACAGTGTCA       |
|             | V3THS_309858 | TGAACTCGGACATTGTTCC       |
|             | V3THS_309859 | AGATCTCTTTATCTATCGT       |
|             | V3THS_309856 | ATGACACTGTCTTGCTTGT       |
